# Supplementary material for: Rapamycin reduces neuronal mutant huntingtin aggregation and ameliorates locomotor performance in Drosophila
Source: PubMed Central journal article supplement (PMC10562706; doi:10.3389/fnagi.2023.1223911), 2023-09-26
Supplement: Presentation_1.pdf [file Presentation_1.pdf]

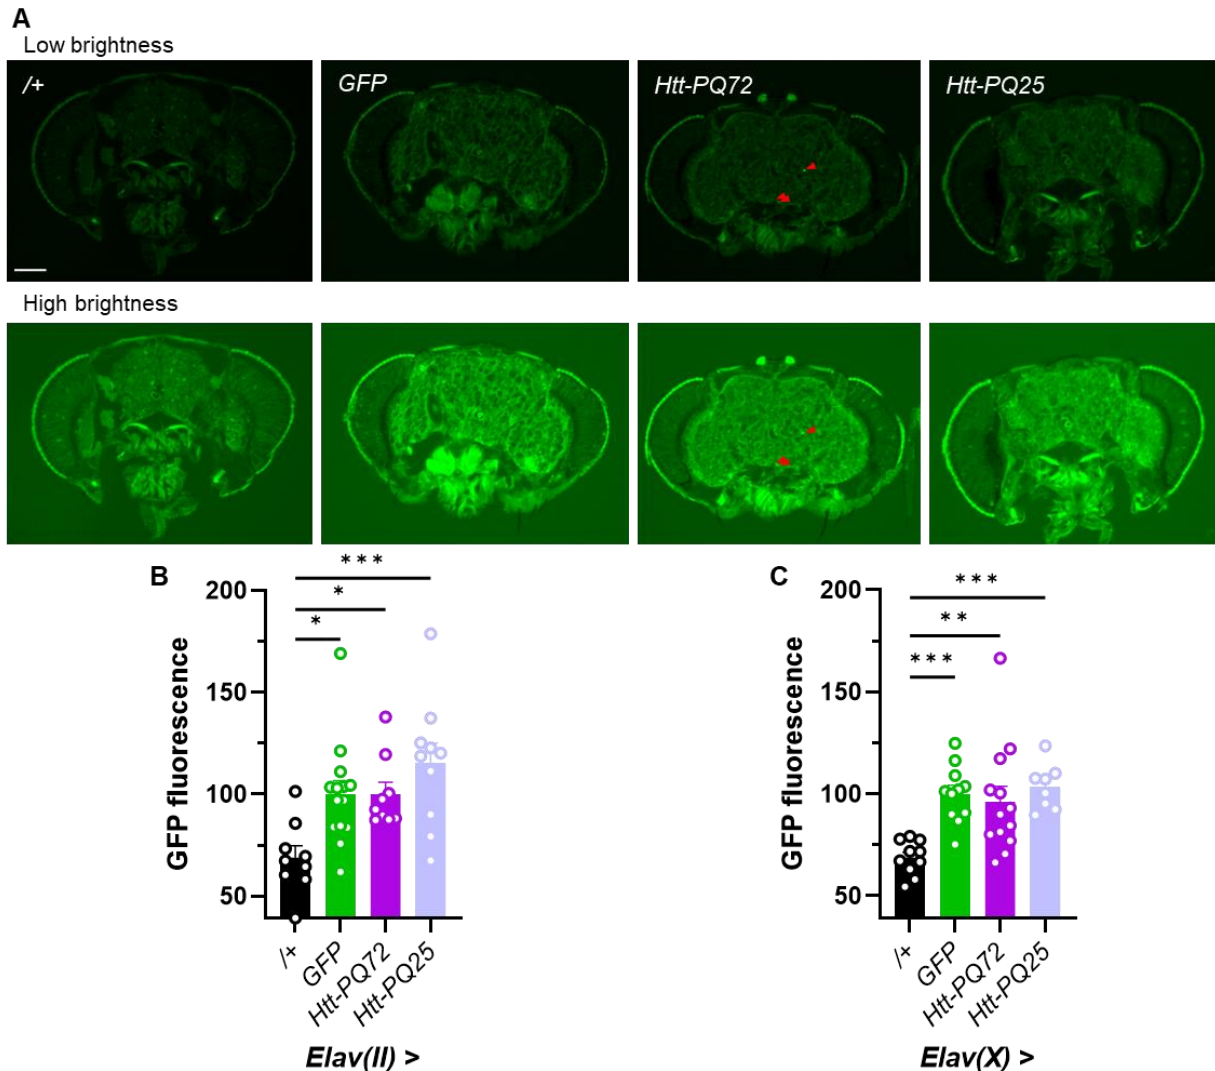

**Supplementary Figure 1: *Elav* drives similar GFP expression in *GFP*, *Htt-PQ72*, and *Htt-PQ25* fly brains.** (A) Representative images of P28 *Elav(II)* fly heads. Top row is low brightness, which shows aggregates in *Elav(II)* > *Htt-PQ72* brains. Red arrows point to PQ-GFP aggregates in the insets. These are the same images in Figure 1C. Bottom row is brightened to show GFP expression in the brain of flies expressing *GFP*, *Htt-PQ72*, and *Htt-PQ25*, but not driver control, though it is now hard to see aggregates (red arrows). Scale bar = 100  $\mu$ m. (B) Quantification of GFP fluorescence shows significant expression of GFP in *GFP*, *Htt-PQ72*, and *Htt-PQ25* compared to background fluorescence in driver control flies driven by *Elav(II)* at P28 (ANOVA  $F(3,38) = 6.1$ ,  $p = 0.002$ , Dunnett's *post hoc* \*:  $p = 0.01$ , \*\*\*:  $p < 0.001$  compared to driver control,  $N = 8-13$  flies per group). (C) Quantification of GFP fluorescence shows significant expression of GFP in *GFP*, *Htt-PQ72*, and *Htt-PQ25* compared to background fluorescence in driver control flies driven by *Elav(X)* at P21 (ANOVA  $F(3,38) = 7.7$ ,  $p = 0.004$ , Dunnett's *post hoc* \*\*:  $p < 0.01$ , \*\*\*:  $p < 0.001$  compared to driver control,  $N = 8-13$  flies per group).
